# Supplementary material for: Increased Adiposity as a Potential Risk Factor for Lower Academic Performance: A Cross-Sectional Study in Chilean Adolescents from Low-to-Middle Socioeconomic Background
Source: MDPI journal article supplement (doi:10.3390/nu10091133), 2018-08-21
Supplement: s1 [file s1]

**SUPPLEMENTARY MATERIAL**

**Table S1 Comparison of participants included and excluded in the current analysis**

|                                       | Total sample<br>(n=679) |           | Enrolled in high school<br>(n=632) |           | Non-enrolled in high school<br>(n=47) |           | P value*           |
|---------------------------------------|-------------------------|-----------|------------------------------------|-----------|---------------------------------------|-----------|--------------------|
|                                       | Mean or n               | (SD) or % | Mean or n                          | (SD) or % | Mean or n                             | (SD) or % |                    |
| <b>Chronological age</b>              |                         |           |                                    |           |                                       |           |                    |
| Age at assessment (y)                 | 16.8                    | (0.2)     | 16.8                               | (0.1)     | 16.9                                  | (0.3)     | NS                 |
| <b>Sex</b>                            |                         |           |                                    |           |                                       |           |                    |
| Male                                  | 357                     | 52.6%     | 330                                | 52.2%     | 27                                    | 57.5%     | NS <sup>‡</sup>    |
| <b>Anthropometrics</b>                |                         |           |                                    |           |                                       |           |                    |
| Body-Mass Index (z score)             | 0.65                    | (1.2)     | 0.64                               | (1.2)     | 0.81                                  | (1.5)     | NS                 |
| Waist circumference (cm)              | 81.3                    | (11.3)    | 81.0                               | (11.1)    | 84.9                                  | (2.1)     | 0.024              |
| Total Fat Mass (%)                    | 29.0                    | (10.7)    | 29.0                               | (10.6)    | 29.4                                  | (10.9)    | NS                 |
| <i>Weight status</i>                  |                         |           |                                    |           |                                       |           |                    |
| Excess weight                         | 262                     | 38.6%     | 241                                | 38.1%     | 21                                    | 44.7%     | NS <sup>‡</sup>    |
| Abdominal obesity                     | 226                     | 33.3%     | 206                                | 32.6%     | 20                                    | 42.6%     | NS <sup>‡</sup>    |
| High adiposity                        | 301                     | 44.3%     | 280                                | 44.3%     | 21                                    | 43.5%     | NS <sup>‡</sup>    |
| <b>Parental education</b>             |                         |           |                                    |           |                                       |           |                    |
| Mother's: incomplete secondary        | 240                     | 35.4%     | 212                                | 33.5%     | 28                                    | 60.9%     | 0.044 <sup>‡</sup> |
| Father's: incomplete secondary        | 192                     | 28.3%     | 176                                | 27.9%     | 26                                    | 34.8%     | NS <sup>‡</sup>    |
| <b>Lifestyles</b>                     |                         |           |                                    |           |                                       |           |                    |
| Unhealthy eating                      | 151                     | 22.3%     | 132                                | 20.9%     | 19                                    | 40.4%     | 0.002 <sup>‡</sup> |
| Physically inactive                   | 403                     | 59.4%     | 367                                | 58.1%     | 36                                    | 76.6%     | 0.013 <sup>‡</sup> |
| <b>Family structure</b>               |                         |           |                                    |           |                                       |           |                    |
| Fatherless home                       | 274                     | 40.4%     | 250                                | 39.6%     | 24                                    | 51.1%     | NS <sup>‡</sup>    |
| <b>Iron supplementation (6-12 mo)</b> |                         |           |                                    |           |                                       |           |                    |
| No-added Fe                           | 286                     | 42.2%     | 269                                | 42.6%     | 17                                    | 37.0%     | NS <sup>‡</sup>    |

\* Two-tailed Student's *t* test for independent samples except as indicated. <sup>‡</sup> Pearson's Chi<sup>2</sup>. <sup>§</sup> School grades expressed as standardized score, according to the Ministry of Education (Chile). Excess weight: BMIz >2 SD. Abdominal obesity: WC >90 cm and >80 cm in males and females, respectively. High adiposity: Total Fat Mass ≥25% and ≥35%, respectively.
